# Supplementary material for: Granulosa cell insight: unraveling the potential of menstrual blood-derived stem cells and their exosomes on mitochondrial mechanisms in polycystic ovary syndrome (PCOS)
Source: PubMed Central journal article supplement (PMC11330151; doi:10.1186/s13048-024-01484-3), 2024-08-17
Supplement: 13048_2024_1484_MOESM1_ESM.pdf [file 13048_2024_1484_MOESM1_ESM.pdf]

M. Mansoori

SARA

CD63  
glycosylated ←

Core ←

3920

SARA

→ 30-60 kDa

→ 26 kDa

M. Mansoori

SARA

CD9 ←

3920

SARA

→ 24KD

M. Mansoori

**SARA**

CD63  
glycosylated ←

Core ←

3920

**SARA**

→ 30.60 kDa

→ 26 kDa

M. Mansoori

SARA

CD9 ←

3920  
SARA

→ 24KD
